# Supplementary material
Source: publisher figshare collection journal article supplement (https://acs.figshare.com/ndownloader/files/28864291)
Supplement: Supplementary file 1 [file 28864291]

## **Supporting Information**

Three-dimensional surface layer and composite aphroid  
layer constructed by facile rolling method for high-  
performance Li metal anode

Yanyuan Qi<sup>a</sup>, Lin Lin<sup>a</sup>, Zelang Jian<sup>a</sup>, Qiongzheng Fan<sup>a</sup>, Wen Chen<sup>a,\*</sup>

<sup>a</sup> State Key Laboratory of Advanced Technology for Materials Synthesis and Processing,  
School of Materials Science and Engineering, Wuhan University of Technology,  
Wuhan 430070, People's Republic of China.

\* Corresponding authors.

E-mail address: chenw@whut.edu.cn (W. Chen)

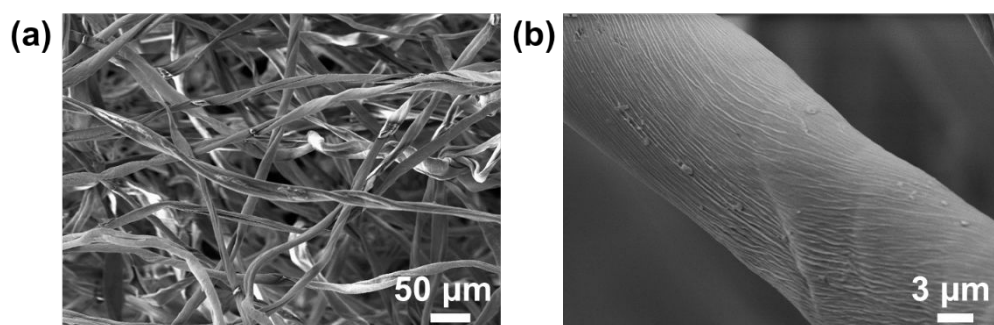

**Figure S1.** The SEM images of the commercial degreasing cotton.

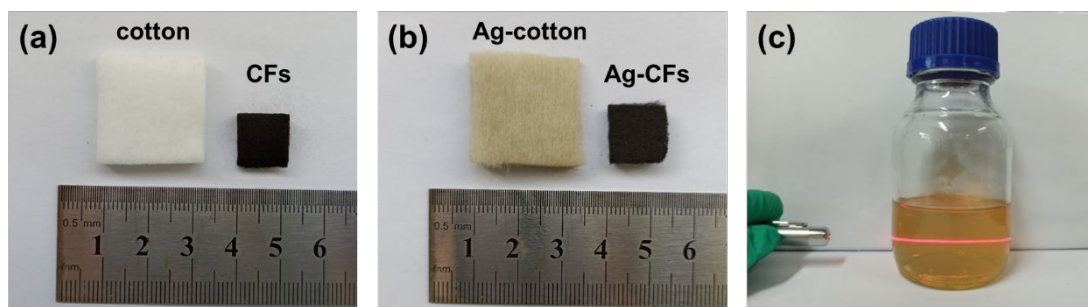

**Figure S2.** Photographs of (a) the cotton and as-prepared CFs, (b) the cotton impregnated with the Ag solution (Ag-cotton) and as-prepared Ag-CFs, (c) as-prepared Ag solution.

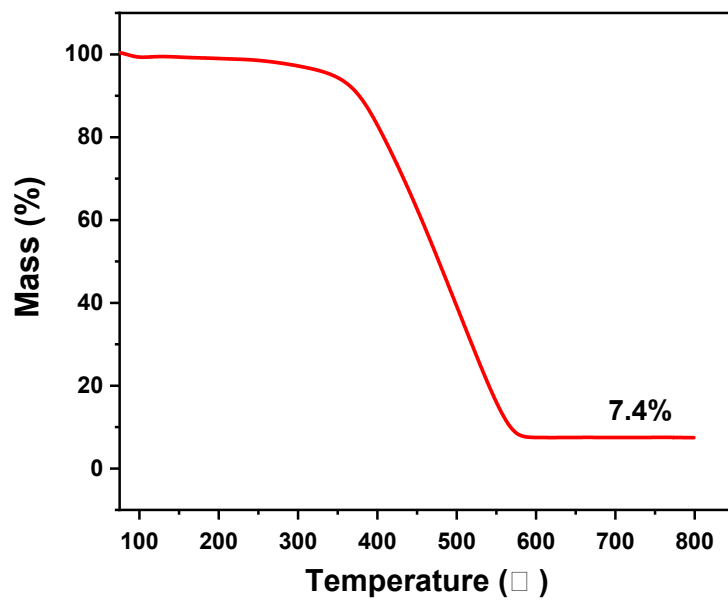

**Figure S3.** Thermogravimetric analysis (TGA) curve of the Ag-CFs.

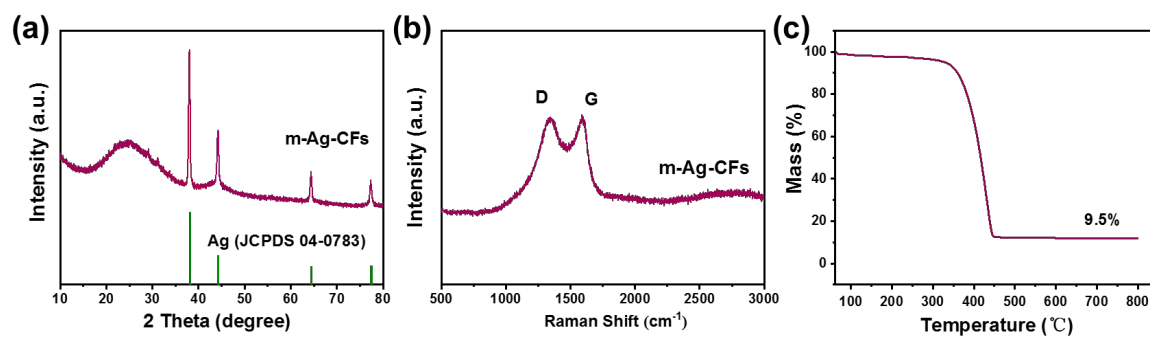

**Figure S4.** (a) XRD patterns, (b) Raman spectra and (c) TGA curve of the m-Ag-CFs.

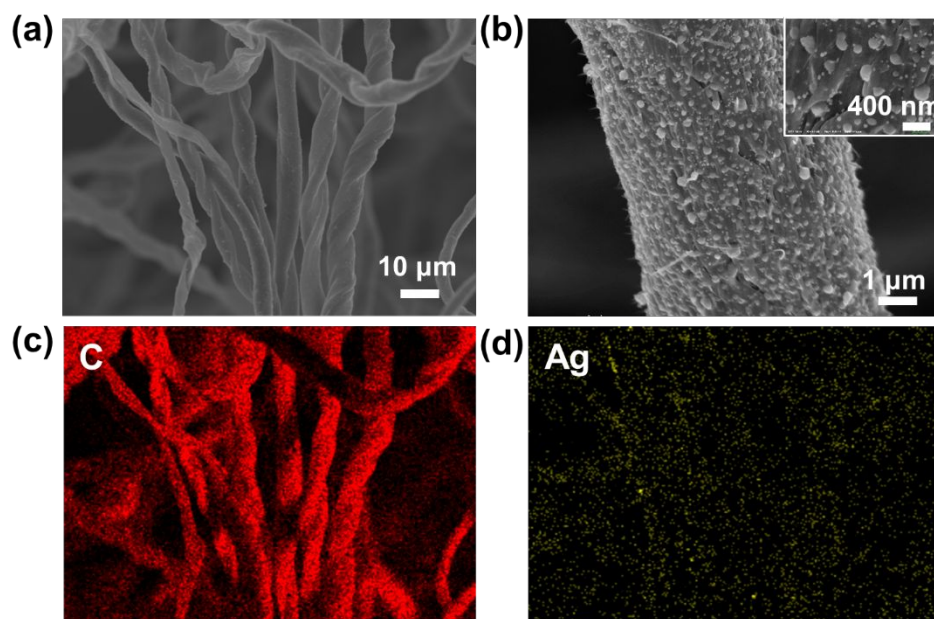

**Figure S5.** (a, b) The FESEM images at different magnifications and (c, d) the corresponding EDS mappings of m-Ag-CFs.

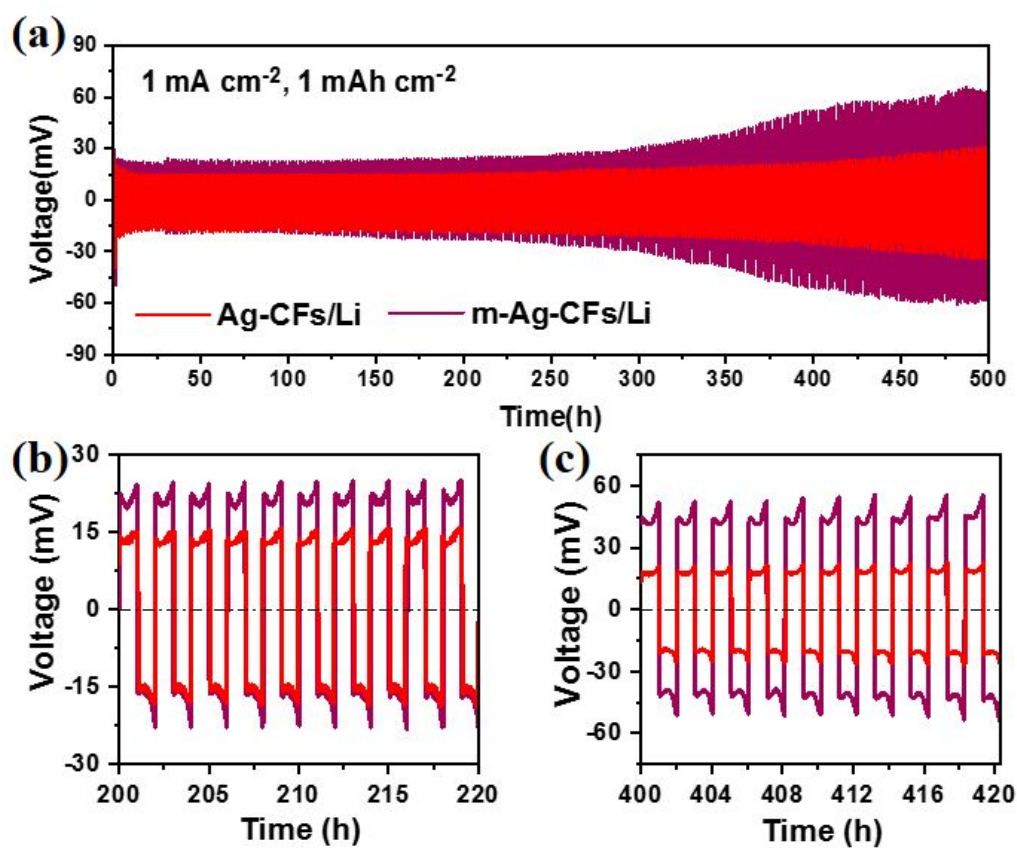

**Figure S6.** (a) Voltage-time profiles of Ag-CFs/Li and m-Ag-CFs/Li in symmetric cells with ether-based electrolyte ( 1 M LiTFSI in 1:1 v/v DOL/DME ) at 1.0 mA cm<sup>-2</sup> and capacity of 1.0 mAh cm<sup>-2</sup>. (b, c) The local magnification of (a) at 200–220 h and at 400–420 h, respectively.

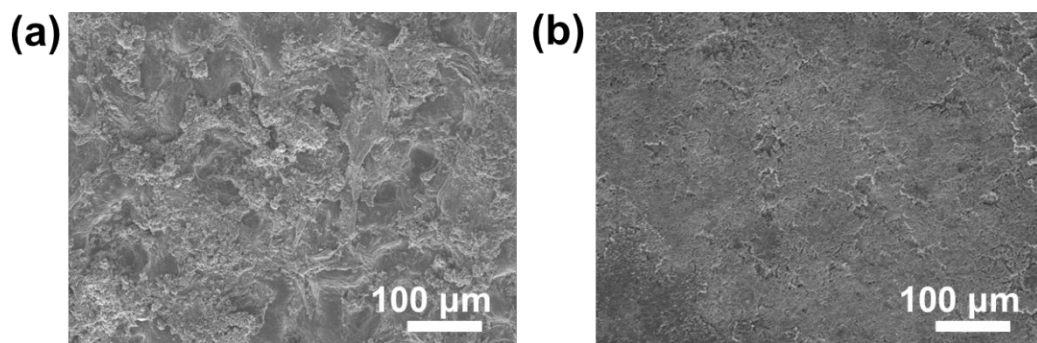

**Figure S7.** The surface FESEM images of (a) bare Li anode and (b) Ag-CFs/Li composite anode after cycling for 500 h.

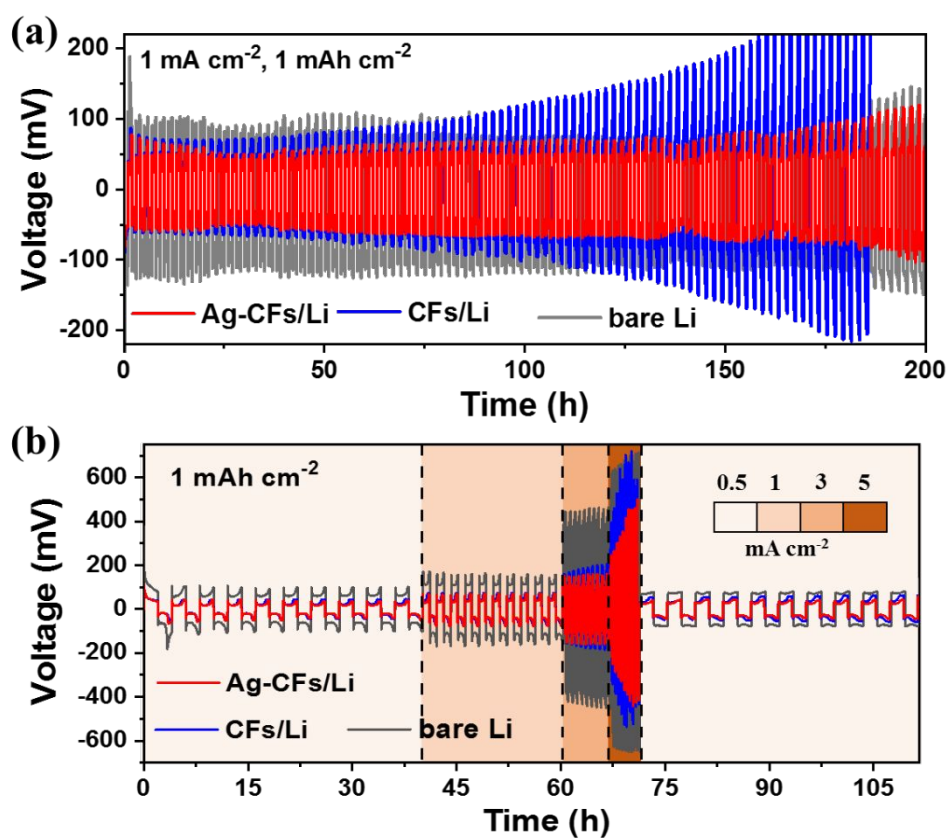

**Figure S8.** (a) Voltage-time profiles and (b) rate capabilities of Ag-CFs/Li, CFs/Li and bare Li in symmetric cells with carbonate electrolyte (1 M  $\text{LiPF}_6$  in 1:1 v/v EC/DEC).
